# Supplementary material for: A Criterion Space Method for Biobjective Mixed Integer Programming: The Boxed Line Method
Source: Atypon-hosted journal article supplement (doi:10.1287/ijoc.2019.0887), 2019-08-07
Supplement: ijoc.2019.0887.sm1.pdf [file ijoc.2019.0887.sm1.pdf]

Authors are encouraged to submit new papers to INFORMS journals by means of a style file template, which includes the journal title. However, use of a template does not certify that the paper has been accepted for publication in the named journal. INFORMS journal templates are for the exclusive purpose of submitting to an INFORMS journal and should not be used to distribute the papers in print or online or to submit the papers to another publication.

## Online Supplement for “A Criterion Space Method for Biobjective Mixed Integer Programming: the Boxed Line Method”

Tyler Perini, Natashia Boland, Diego Pecin, Martin Savelsbergh  
H. Milton Stewart School of Industrial and Systems Engineering  
Georgia Institute of Technology, Atlanta

# 1. Pseudocode of basic variant of the Boxed Line Method

---

## Algorithm 1 BasicOuterLoop

---

**Input:** Objective functions  $z_1(x), z_2(x)$  and feasible set  $X$  are *fixed and global*

**Output:**  $N$  the entire nondominated frontier as a set of line segments,  $Q$  any unexplored regions of the frontier space (for partial run-time)

```

1:  $z^L \leftarrow \text{lexmin}\{(z_1, z_2), IP\}$  is the UL nondominated point
2:  $z^R \leftarrow \text{lexmin}\{(z_2, z_1), IP, ifs = z^L.\text{solution}\}$  is the BR nondominated point
3:  $N \leftarrow \text{point}(z^L) \cup \text{point}(z^R)$ 
4: if  $\min_{i=1,2}\{|z_i^L - z_i^R|\} < \epsilon$  then
5:    $Q \leftarrow \emptyset$  no region to explore
6:   return  $(N, Q)$ 
7: else
8:    $Q \leftarrow B(z^L, z^R)$  the unexplored region defined by box with corner points  $z^L, z^R$ 
9: end if
10: while  $Q \neq \emptyset$  do
11:    $B(z^L, z^R) \leftarrow \text{element}(Q)$ 
12:    $Q \leftarrow \text{setminus}(Q, B(z^L, z^R))$ 
13:    $\mu \in (z_2^R, z_2^L)$  arbitrary horizontal dividing line between  $z^L, z^R$ 
14:    $z^* \leftarrow \text{lexmin}\{(z_1, z_2) : z_2(x) \leq \mu, IP, ifs = z^R.\text{solution}\}$  find NDP in lower half
15:   if  $\mu - z_2^* > \epsilon$  then
16:     if  $\min_{i=1,2}\{|z_i^* - z_i^R|\} < \epsilon$  then
17:        $N \leftarrow N \cup \text{point}(z^*)$  if epsilon-close, add to ND frontier, do not add region to queue
18:     else
19:        $Q \leftarrow Q \cup B(z^*, z^R)$  otherwise, add a new unexplored region to the queue
20:     end if
21:      $\hat{z} \leftarrow \text{lexmin}\{(z_2, z_1) : z_1(x) \leq z_1^* - \epsilon, IP, ifs = z^L.\text{solution}\}$ 
22:     if  $\min_{i=1,2}\{|\hat{z}_i - z_i^L|\} < \epsilon$  then
23:        $N \leftarrow N \cup \text{point}(\hat{z})$ 
24:     else
25:        $Q \leftarrow Q \cup B(z^L, \hat{z})$ 
26:     end if
27:   else  $\{|z_2^* - \mu| < \epsilon\}$ 
28:      $(z^1, z^2, z1\_open, z2\_open, M) \leftarrow \text{BasicInnerLoop}(z^*, z^L, z^R)$ 
29:     if  $\min_{i=1,2}\{|z_i^1 - z_i^2|\} < \epsilon$  then
30:        $N \leftarrow N \cup M \cup \text{point}(z^1) \cup \text{point}(z^2)$   $M$  only includes NDPs that dominate  $z^1$  or  $z^2$ 
31:     else
32:        $N \leftarrow N \cup M \cup \text{line}(z^1, z^2)$ 
33:     end if
34:     if  $z1\_open$  then
35:        $\hat{z}^1 \leftarrow \text{argmin}\{m_2 : m \in M \cup z^L, m_2 \geq z_2^1\}$  NDP found from Inner Loop that dominates  $z^1$ 
36:     else  $\{z^1$  is closed $\}$ 
37:        $\hat{z}^1 \leftarrow z^1$  closed endpoint as LR boundary of unexplored region
38:     end if
39:     if  $\min_{i=1,2}\{|z_i^L - \hat{z}_i^1|\} < \epsilon$  then
40:        $N \leftarrow N \cup \text{point}(z^L) \cup \text{point}(\hat{z}^1)$  add to frontier
41:     else
42:        $Q \leftarrow Q \cup B(z^L, \hat{z}^1)$  add to queue
43:     end if
44:     if  $z2\_open$  then
45:        $\hat{z}^2 \leftarrow \text{argmin}\{m_1 : m \in M \cup z^R, m_1 \geq z_1^2\}$  NDP found from Inner Loop that dominates  $z^2$ 
46:     else  $\{z^2$  is closed $\}$ 
47:        $\hat{z}^2 \leftarrow z^2$  closed endpoint as UL boundary of unexplored region
48:     end if
49:     if  $\min_{i=1,2}\{|\hat{z}_i^2 - z_i^R|\} < \epsilon$  then
50:        $N \leftarrow N \cup \text{point}(\hat{z}^2) \cup \text{point}(z^R)$  add to frontier
51:     else
52:        $Q \leftarrow Q \cup B(\hat{z}^2, z^R)$  add to queue
53:     end if
54:   end if
55: end while
56: return  $(N, Q)$ 

```

---

---

## Algorithm 2 BasicInnerLoop

---

**Input:** nondominated point  $z^* = \text{lexmin}\{(z_1, z_2) : z_2(x) \leq \mu\}$  such that  $z^*$  on the split, i.e.  $z_2^* = \mu$   
**Input:**  $z^L, z^R$  upper-left and lower-right boundaries of the rectangle to explore  
**Output:**  $(z^1, z^2, z1\_open, z2\_open, M)$  the UL and BR nondominated points endpoints defining the line segment of the non-dominated frontier containing  $z^*$ ; markers to tell whether each endpoint is open (TRUE) or closed (FALSE); and the nondominated points that dominate open endpoints in  $M$

- 1:  $(z^1, z^2, \bar{w}, w\_known) \leftarrow \text{LineGen}(z^*, z^L, z^R)$  generate line segment of frontier that contains  $z^*$  for integer vector  $x_I^*$  via Line Generation subroutine (line segment defined by two endpoints) and return slope of the line segment to be used for scalarization
- 2: **if**  $|z_2^1 - z_2^2| < \epsilon$  and  $|z_1^1 - z_1^2| > \epsilon$  **then**
- 3:    $z1\_open \leftarrow TRUE$  because  $z^L$  dominates  $z^1$
- 4: **else**
- 5:    $z1\_open \leftarrow FALSE$  temporary status with best of known information
- 6: **end if**
- 7: **if**  $|z_1^1 - z_1^R| < \epsilon$  and  $|z_2^1 - z_2^R| > \epsilon$  **then**
- 8:    $z2\_open \leftarrow TRUE$
- 9: **else**
- 10:    $z2\_open \leftarrow FALSE$
- 11: **end if**
- 12:  $M \leftarrow \emptyset$
- 13: **if**  $\min_{i=1,2} \{|z_i^1 - z_i^2|\} < \epsilon$  **or**  $\neg w\_known$  **then**
- 14:   **return**  $(z^*, z^*, z1\_open, z2\_open, M)$  ND segment is just the isolated nondominated point  $z^*$
- 15: **end if**
- 16:  $y^* \leftarrow \text{solution}(\min\{\bar{w}^T z(x) : z_1(x) \leq z_1^2 - \epsilon(z2\_open), z_2(x) \leq z_2^1 - \epsilon(z1\_open), IP, ifs = z^*.solution\})$  (epsilon adjustments only for open endpoints)
- 17: **while**  $\bar{w}^T z(y^*) < \bar{w}^T z^* - \epsilon$  ( $z^*$  is suboptimal to  $z(y^*)$  w.r.t.  $\bar{w}$ ) **do**
- 18:   **if**  $\min_{i=1,2} \{|z_i^* - z_i(y^*)|\} < \epsilon$  and  $\max_{i=1,2} \{|z_i^* - z_i(y^*)|\} > \epsilon$  **then**
- 19:     ERROR message
- 20:   **end if**
- 21:   **if**  $z_1(y^*) \leq z_1^* - \epsilon$  **then**
- 22:      $\hat{v}.solution \leftarrow \min\{z_2(x) : \bar{w}^T z(x) \leq \bar{w}^T z^*, x_I = y_I^*, LP, ifs = y_I^*\}$  explore the slice of  $y_I^*$
- 23:      $\hat{v} \leftarrow z(\hat{v}.solution)$
- 24:     **if**  $\hat{v} \in \text{line}(z^1, z^2)$  **then**
- 25:        $\hat{v}.solution \leftarrow \min\{z_1(x) : z_2(x) \leq \hat{v}_2 + \epsilon, x_I = y_I^*, LP, ifs = y_I^*\}$  correct  $\hat{v}$
- 26:        $\hat{v} \leftarrow z(\hat{v}.solution)$
- 27:     **end if**
- 28:     **if**  $\hat{v} \in \text{line}(z^1, z^2)$  **then**
- 29:        $z^1 \leftarrow \hat{v}$
- 30:        $z1\_open \leftarrow FALSE$
- 31:     **else**  $\{\hat{v} \notin \text{line}(z^1, z^2)\}$
- 32:        $v^1 \leftarrow \hat{v}$  keep track of most recent  $\hat{v}$  that dominates  $z^1$
- 33:        $z^1 \leftarrow \text{point}(\text{line}(z^1, z^2), z_2 = \hat{v}_2)$
- 34:        $z1\_open \leftarrow TRUE$
- 35:     **end if**
- 36:   **end if**
- 37:   **if**  $z_1(y^*) \geq z_1^* + \epsilon$  **then**
- 38:      $\hat{v}.solution \leftarrow \min\{z_1(x) : \bar{w}^T z(x) \leq \bar{w}^T z^*, x_I = y_I^*, LP, ifs = y_I^*\}$  explore the slice of  $y_I^*$
- 39:      $\hat{v} \leftarrow z(\hat{v}.solution)$
- 40:     **if**  $\hat{v} \in \text{line}(z^1, z^2)$  **then**
- 41:        $z^2 \leftarrow \hat{v}$
- 42:        $z2\_open \leftarrow FALSE$
- 43:     **else**  $\{\hat{v} \notin \text{line}(z^1, z^2)\}$
- 44:        $v^2 \leftarrow \hat{v}$  keep track of most recent  $\hat{v}$  that dominates  $z^2$
- 45:        $z^2 \leftarrow \text{point}(\text{line}(z^1, z^2), z_1 = \hat{v}_1)$
- 46:        $z2\_open \leftarrow TRUE$
- 47:     **end if**
- 48:   **end if**
- 49:    $y^* \leftarrow \text{solution}(\min\{\bar{w}^T z(x) : z_1(x) \leq z_1^2 - \epsilon(z2\_open), z_2(x) \leq z_2^1 - \epsilon(z1\_open), IP, ifs = z^*\})$
- 50: **end while**
- 51: **if**  $z1\_open$  and  $|z_2^1 - z_2^L| > \epsilon$  **then**
- 52:    $\hat{z}^1 \leftarrow \text{point}(\min\{z_1(x) : z_2(x) \leq z_2^1, IP, ifs = v^1.solution\}, z_2^1)$  NDP that dominates  $z^1$
- 53:    $M \leftarrow M \cup \hat{z}^1$
- 54: **end if**
- 55: **if**  $z2\_open$  and  $|z_1^1 - z_1^R| > \epsilon$  **then**
- 56:    $\hat{z}^2 \leftarrow \text{point}(z_2^2, \min\{z_2(x) : z_1(x) \leq z_1^1, IP, ifs = v^2.solution\})$  NDP that dominates  $z^2$
- 57:    $M \leftarrow M \cup \hat{z}^2$
- 58: **end if**
- 59: **return**  $(z^1, z^2, z1\_closed, z2\_closed, M)$

---

---

**Algorithm 3** RecursiveOuterLoop

---

**Input:** Objective functions  $z_1(x), z_2(x)$  and feasible set  $X$  are *fixed and global***Output:**  $N$  the entire nondominated frontier as a set of line segments,  $Q$  any unexplored regions of the frontier space (for partial run-time)

```

1:  $z^L \leftarrow \text{lexmin}\{(z_1, z_2), IP\}$  is the UL nondominated point
2:  $z^R \leftarrow \text{lexmin}\{(z_2, z_1), IP, ifs = z^L.\text{solution}\}$  is the BR nondominated point
3:  $N \leftarrow \text{point}(z^L) \cup \text{point}(z^R)$ 
4: if  $\min_{i=1,2}\{|z_i^L - z_i^R|\} < \epsilon$  then
5:    $Q \leftarrow \emptyset$  no region to explore
6:   return  $(N, Q)$ 
7: else
8:    $Q \leftarrow B(z^L, z^R)$  the unexplored region defined by box with corner points  $z^L, z^R$ 
9: end if
10: while  $Q \neq \emptyset$  do
11:    $B(z^L, z^R) \leftarrow \text{element}(Q)$ 
12:    $Q \leftarrow \text{setminus}(Q, B(z^L, z^R))$ 
13:    $\mu \in (z_2^R, z_2^L)$  arbitrary horizontal dividing line between  $z^L, z^R$ 
14:    $z^* \leftarrow \text{lexmin}\{(z_1, z_2) : z_2(x) \leq \mu, IP, ifs = z^R.\text{solution}\}$  find NDP in lower half
15:   if  $\mu - z_2^* > \epsilon$  then
16:     if  $\min_{i=1,2}\{|z_i^* - z_i^R|\} < \epsilon$  then
17:        $N \leftarrow N \cup \text{point}(z^*)$  if epsilon-close, add to ND frontier, do not add region to queue
18:     else
19:        $Q \leftarrow Q \cup B(z^*, z^R)$  otherwise, add a new unexplored region to the queue
20:     end if
21:      $\hat{z} \leftarrow \text{lexmin}\{(z_2, z_1) : z_1(x) \leq z_1^* - \epsilon, IP, ifs = z^L.\text{solution}\}$ 
22:     if  $\min_{i=1,2}\{|\hat{z}_i - z_i^L|\} < \epsilon$  then
23:        $N \leftarrow N \cup \text{point}(\hat{z})$ 
24:     else
25:        $Q \leftarrow Q \cup B(z^L, \hat{z})$ 
26:     end if
27:   else  $\{|z_2^* - \mu| < \epsilon\}$ 
28:      $L \leftarrow \emptyset$  no known line segments so far
29:      $M \leftarrow \text{RecursiveInnerLoop}(z^*, z^L, z^R, L)$   $M$  includes all found ND points and line segments
30:      $M_{<} \leftarrow \text{Orderbyz1}(\{z^L, z^R\} \cup M)$  giving ordered set  $(z^L, m^1, \dots, m^k, z^R)$ 
31:     for  $\forall$  consecutive pairs  $(a, b) \subset M_{<}$  do
32:       if  $\text{line}(a, b) \in M$  then
33:          $N \leftarrow N \cup \text{line}(a, b)$  add line segment to frontier
34:       else
35:          $N \leftarrow N \cup \text{point}(a) \cup \text{point}(b)$  add individual points to frontier
36:         if  $\min_{i=1,2}\{|a_i - b_i|\} > \epsilon$  then
37:            $Q \leftarrow Q \cup B(a, b)$  add unexplored region to queue
38:         end if
39:       end if
40:     end for
41:   end if
42: end while
43: return  $(N, Q)$ 

```

---

---

## Algorithm 4 RecursiveInnerLoop

---

**Input:** nondominated point  $z^*$   
**Input:**  $z^L, z^R$  known NDPs providing the upper-left and lower-right corner points of the box  
**Input:**  $L$  the set of all inherited line segments so far (for line trimming); note that  $L = \emptyset$  on first call  
**Output:**  $M$  all found nondominated points/line segments

- 1:  $(z^1, z^2, \bar{w}, w\_known) \leftarrow LineGen(z^*, z^L, z^R)$
- 2: **if**  $w\_known$  **then**
- 3:    $(z^1, z^2) \leftarrow LineTrim(z^*, z^1, z^2, \bar{w}, L)$
- 4: **end if**
- 5: **if**  $|z_2^1 - z_2^L| < \epsilon$  and  $|z_1^1 - z_1^L| > \epsilon$  **then**
- 6:    $z1\_open \leftarrow TRUE$  because  $z^L$  dominates  $z^1$
- 7: **else**
- 8:    $z1\_open \leftarrow FALSE$  temporary status with best of known information
- 9: **end if**
- 10: **if**  $|z_1^2 - z_1^R| < \epsilon$  and  $|z_2^2 - z_2^R| > \epsilon$  **then**
- 11:    $z2\_open \leftarrow TRUE$
- 12: **else**
- 13:    $z2\_open \leftarrow FALSE$
- 14: **end if**
- 15:  $M \leftarrow \emptyset$
- 16: **if**  $\min_{i=1,2} \{|z_i^1 - z_i^2|\} < \epsilon$  or  $\neg w\_known$  **then**
- 17:    $M \leftarrow M \cup point(z^*)$  frontier is just the isolated nondominated point  $z^*$
- 18:   **return**  $M$
- 19: **else**
- 20:    $L \leftarrow L \cup line(z^1, z^2)$
- 21: **end if**
- 22:  $y^* \leftarrow solution(\min\{\bar{w}^T z(x) : z_1(x) \leq z_1^1 - \epsilon(z2\_open), z_2(x) \leq z_2^1 - \epsilon(z1\_open), IP, ifs = z^*.solution\})$  (epsilon adjustment only for open endpoints)
- 23: **while**  $\bar{w}^T z(y^*) < \bar{w}^T z^* - \epsilon$  ( $z^*$  is suboptimal to  $z(y^*)$  w.r.t.  $\bar{w}$ ) **do**
- 24:   **if**  $\min_{i=1,2} \{|z_i^* - z_i(y^*)|\} < \epsilon$  and  $\max_{i=1,2} \{|z_i^* - z_i(y^*)|\} > \epsilon$  **then**
- 25:     ERROR message
- 26:   **end if**
- 27:    $M \leftarrow M \cup z(y^*)$
- 28:   **if**  $z_1(y^*) \leq z_1^1 - \epsilon$  **then**
- 29:      $\alpha \leftarrow \operatorname{argmin}\{p_2 : p \in z^L \cup M, p_1 < z_1^1\}$  bound by the nearest (on left) found NDP to  $z^*$
- 30:      $M' \leftarrow InnerLoop(z(y^*), \alpha, z^*, L)$  recurse within  $B(\alpha, z^*)$  with inherited line segments in  $L$
- 31:      $M \leftarrow M \cup M'$
- 32:      $L \leftarrow L \setminus line(z^1, z^2)$  remove "old" line segment
- 33:      $\hat{p} \leftarrow \operatorname{argmin}\{p_2 : p \in M, p_1 < z_1^1\}$  choose the nearest (on left) found NDP to  $z^*$
- 34:     **if**  $\hat{p} \in line(z^1, z^2)$  **then**
- 35:        $z^1 \leftarrow \hat{p}$
- 36:        $z1\_open \leftarrow FALSE$
- 37:     **else**  $\{\hat{p} \notin line(z^1, z^2)\}$
- 38:        $z^1 \leftarrow point(line(z^1, z^2), z_2 = \hat{p}_2)$
- 39:        $z1\_open \leftarrow TRUE$
- 40:     **end if**
- 41:   **end if**
- 42:   **if**  $z_1(y^*) \geq z_1^1 + \epsilon$  **then**
- 43:      $\beta \leftarrow \operatorname{argmin}\{p_1 : p \in z^R \cup M, p_2 < z_2^1\}$
- 44:      $M' \leftarrow InnerLoop(z(y^*), z^*, \beta, L)$  recurse within  $B(z^*, \beta)$
- 45:      $M \leftarrow M \cup M'$
- 46:      $\hat{p} \leftarrow \operatorname{argmin}\{p_1 : p \in M, p_2 < z_2^1\}$  choose the nearest (on right) found NDP to  $z^*$
- 47:     **if**  $\hat{p} \in line(z^1, z^2)$  **then**
- 48:        $z^2 \leftarrow \hat{p}$
- 49:        $z2\_open \leftarrow FALSE$
- 50:     **else**  $\{\hat{p} \notin line(z^1, z^2)\}$
- 51:        $z^2 \leftarrow point(line(z^1, z^2), z_1 = \hat{p}_1)$
- 52:        $z2\_open \leftarrow TRUE$
- 53:     **end if**
- 54:   **end if**
- 55:    $L \leftarrow L \cup line(z^1, z^2)$  add updated line segment
- 56:    $y^* \leftarrow solution(\min\{\bar{w}^T z : z_1(x) \leq z_1^1 - \epsilon(z2\_open), z_2(x) \leq z_2^1 - \epsilon(z1\_open), IP, ifs = z^*.solution\})$  (epsilon adjustment only for open endpoints)
- 57: **end while**
- 58:  $M \leftarrow M \cup line(z^1, z^2)$
- 59: **return**  $M$

---

## 2. Line Segment Generation Subroutine

The purpose of the line segment generation subroutine is to provide the inner loop with a single line segment that can be reduced to an NLS by simply updating the endpoints. Finding the maximal line segment,  $L(z^1, z^2)$ , of the slice problem for given integer solution  $x_I^*$  with  $z^* = z(x^*) \in L(z^1, z^2)$  can be done, in theory, by accessing the values of the dual variables at the optimal branch-and-bound node of the IP that found  $z^*$  and applying LP duality theory. However, we are not confident that, in practice, the IP solver will provide the LP dual variables needed, since it may have found  $z^*$  with a primal heuristic, eliminated variables and/or constraints or modified coefficients with preprocessing, or added constraints. Therefore, we simply use a variant of dichotomic search (Cohon 1978, Aneja and Nair 1979), restricted to a box around  $z^*$  of size sufficiently large to ensure that the gradient of any line segment that contains  $z^*$  and lies within the box can be calculated accurately.

The Boxed Line Method requires the line generation subroutine to produce three inter-related forms of output. Primarily, it seeks the two endpoints of the line segment,  $z^1$  and  $z^2$ . In addition, as long as  $z^1 \neq z^2$ , it seeks the gradient vector,  $\vec{w}$ , of the line segment  $L(z^1, z^2)$ . When  $z^1 = z^2$ , we say that  $\vec{w}$  does not exist; we note that when the gradient vector  $\vec{w}$  exists, it is normalized before it is returned. Obviously, if we have  $z^1$  and  $z^2 \neq z^1$ , then it is trivial to compute  $\vec{w}$ . However, if  $\vec{w}$  is discovered first, it is also possible to find each endpoint by solving the following LPs:

$$x^1 = \arg \min \{ z_1(x) : \vec{w}^T z(x) \leq \vec{w}^T z^*, z_2(x) \leq z_2^L, x_I = x_I^*, x \in \mathcal{X} \}, \text{ and} \quad (1)$$

$$x^2 = \arg \min \{ z_2(x) : \vec{w}^T z(x) \leq \vec{w}^T z^*, z_1(x) \leq z_1^R, x_I = x_I^*, x \in \mathcal{X} \}. \quad (2)$$

Then  $z^1 = z(x^1)$  and  $z^2 = z(x^2)$ . (By construction,  $z^1$  or  $z^2$  should not be outside the box  $B(z^L, z^R)$ , since the box's corner points are NDPs.) Therefore, the subroutine either finds *both* endpoints *or* the gradient of the line segment, and then the remaining output can be computed accordingly. Because of this, Algorithm 5, giving details of the subroutine, is flexible in the order in which these outputs are discovered. The algorithm generally searches for  $z^2$  first, and in the case that neither  $z^2$  nor  $\vec{w}$  are found, then it assumes  $z^2 = z^*$  and searches for  $z^1$ .

---

**Algorithm 5** Line Segment Generation

---

**Input:**  $z^*$  nondominated point whose integer vector is fixed

**Input:**  $z^L, z^R$  upper-left and lower-right boundaries of the rectangle to explore

**Output:**  $(z^1, z^2, \bar{w}, w\_known)$  the UL and BR endpoints for the line segment of frontier including  $z^*$  and the slope of the line segment (if found)

```
1:  $z1\_known, z2\_known \leftarrow FALSE$ 
2:  $w\_known \leftarrow FALSE$  weight vector for which  $z^*$  is optimal (if found, can be used to directly compute  $z^1, z^2$ )
3:  $\delta_1, \delta_2 \leftarrow 100\epsilon$  starting horizontal/vertical distance
4: (Explore for  $z^2$  in lower-right:)
5:  $i \leftarrow 0$ 
6:  $t^i \leftarrow \text{lexmin}\{(z_2, z_1) : z_1(x) \leq z_1^* + \delta_1, LP, ifs = z^*.solution\}$  is the BR nondominated point
7: while  $w\_known = FALSE$  and  $z2\_known = FALSE$  do
8:   if  $\min(|z_1^* - t_1^i|, |z_2^* - t_2^i|) < \epsilon$  then
9:      $z^2 \leftarrow z^*$ 
10:     $z2\_known \leftarrow TRUE$ 
11:    BREAK
12:   end if
13:    $\bar{w}^i \leftarrow \text{slope}(z^*, t^i)$ 
14:    $t^{i+1} \leftarrow \min\{(\bar{w}^i)^T z(x), LP, ifs = z^*.solution\}$  (scalarized by  $\bar{w}^i$ )
15:   if  $(\bar{w}^i)^T t^{i+1} = (\bar{w}^i)^T z^*$  and  $|z_1^* - t_1^i| > \epsilon$  and  $|z_2^* - t_2^i| > \epsilon$  then
16:      $\bar{w} \leftarrow \bar{w}^i$ 
17:      $w\_known \leftarrow TRUE$ 
18:     if  $i \geq 1$  and  $t^i \in B(z^L, z^R)$  then
19:        $z^2 \leftarrow t^i$ 
20:        $z2\_known \leftarrow TRUE$ 
21:     end if
22:     BREAK
23:   end if
24:    $i \leftarrow i + 1$ 
25: end while
```

(continued on next page)

---

---



---

```

26: (Line Generation)
27: if  $w\_known = FALSE$  then
28:   (Explore for  $z^1$  in upper-left:)
29:    $i \leftarrow 0$ 
30:    $t^i \leftarrow \text{lexmin}\{(z_1, z_2) : z_2(x) \leq z_2^* + \delta_2, LP, ifs = z^*.solution\}$  is the UL nondominated point
31: end if
32: while  $w\_known = FALSE$  and  $z1\_known = FALSE$  do
33:   if  $\min(|z_1^* - t_1^i|, |z_2^* - t_2^i|) < \epsilon$  then
34:      $z^1 \leftarrow z^*$ 
35:      $z1\_known \leftarrow TRUE$ 
36:     BREAK
37:   end if
38:    $\bar{w}^i \leftarrow \text{slope}(z^*, t^i)$ 
39:    $t^{i+1} \leftarrow \min\{(\bar{w}^i)^T z(x), LP, ifs = z^*.solution\}$ 
40:   if  $(\bar{w}^i)^T t^{i+1} = (\bar{w}^i)^T z^*$  then
41:      $\bar{w} \leftarrow \bar{w}^i$ 
42:      $w\_known \leftarrow TRUE$ 
43:     if  $i \geq 1$  then
44:        $z^1 \leftarrow t^i$ 
45:        $z1\_known \leftarrow TRUE$ 
46:     end if
47:     BREAK
48:   end if
49:    $i \leftarrow i + 1$ 
50: end while
51: (By the time the code has reached this point, either  $\bar{w}$  is known OR both  $z^1$  and  $z^2$  are known)
52: if  $z1\_known = FALSE$  then
53:    $z^1 \leftarrow \min\{z_1(x) : \bar{w}^T z(x) \leq \bar{w}z^* + \epsilon, z_2(x) \leq z_2^L, LP, ifs = z^*.solution\}$ 
54: end if
55: if  $z2\_known = FALSE$  then
56:    $z^2 \leftarrow \min\{z_2(x) : \bar{w}^T z(x) \leq \bar{w}z^* + \epsilon, z_1(x) \leq z_1^R, LP, ifs = z^*.solution\}$ 
57: end if
58: if  $w\_known = FALSE$  then
59:    $\bar{w} \leftarrow [-1, -1]$  clearly impossible gradient vector
60: end if
61:  $\bar{w} \leftarrow \bar{w} / \|\bar{w}\|_1$ 
62: return  $(z^1, z^2, \bar{w}, w\_known)$ 

```

---

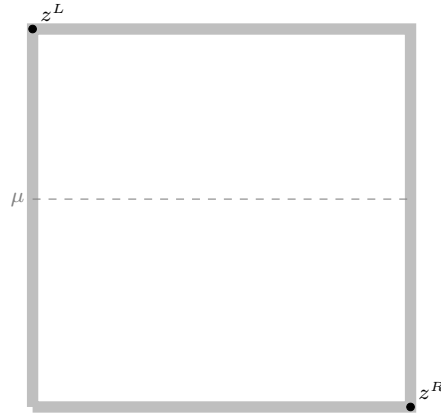

**Figure 1** A region  $Y$  with  $n = 0$  nondominated line segments in its interior and  $g = 1$  vertical gaps. An arbitrary horizontal split line  $z_2 = \mu$  is shown as a dashed line.

### 3. Complexity of the Basic Method

EXAMPLE 1. For  $n = 0$  and  $g = 1$  (see Figure 1),  $\ell(0, 1) = 2$  and  $s(0, 1) = 0$ .

*Proof of Example 1* For any split line  $z_2 = \mu$  where  $z_2^R < \mu < z_2^L$ , we have that the first lexicographic optimization IP (5) returns  $z^R$ . Since we have  $z_2^R < \mu$ , the algorithm continues by solving a second lexicographic optimization IP (6), which yields  $z^L$ . Note that no new regions are added to the queue (because  $B(z^L, z^L)$  and  $B(z^R, z^R)$  are trivially small), so we have that the iteration of the outer loop terminates having solved  $\ell(0, 1) = 2$  lexicographic IPs and  $s(0, 1) = 0$  scalarized IPs.  $\square$

EXAMPLE 2. For  $n = 1$  and  $g = 0$  (see Figure 2),  $\ell(1, 0) = 1$  and  $s(1, 0) = 1$ .

*Proof of Example 2* Since a single NLS traverses  $Y$ , solving the first lexicographic minimization IP (5) with any split line  $z_2 = \mu$  where  $z_2^R < \mu < z_2^L$  will result in  $z^*$  on the split line, i.e.,  $z_2^* = \mu$ . The line generation subroutine will generate the entire line segment within  $Y$ , and because there are no vertical gaps, we must have that  $z_2^1 = z_2^L$  and  $z_2^2 = z_2^R$ . Since  $z^R$  is nondominated, the latter implies  $z^2 = z^R$ , and so  $z^2$  is *closed*. However,  $z^1$  may be open *or* closed; namely, if  $z_1^L < z_1^1$ ,  $z^1$  will be flagged as open. Regardless of whether it is open or closed, the inner loop will solve the single-objective IP (8) once to confirm that the line segment is indeed nondominated (recall that the IP formulation includes a conditionally strict inequality for the open endpoint which makes  $z^L$  infeasible). By our assumption that  $n = 1$ , an optimal solution must exist on the line segment. At the end of the inner loop, since  $z_2^1 = z_2^L$ , no other single-objective IPs will be solved by the inner loop since it is known that  $z^L$  is the NDP that dominates  $z^1$ . After the inner loop concludes,

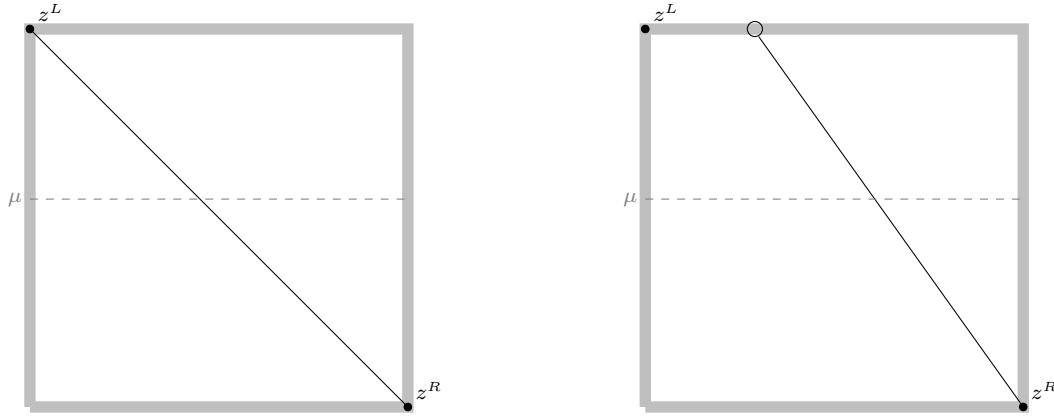

**Figure 2** The only two cases for  $n = 1, g = 0$ : The nondominated line segment must be incident to  $z^R$  to ensure no vertical gap, but the endpoint  $z^1$  may be either closed (left) or open (right).

the outer loop would not add any box to the queue, since they would both be trivially small. Thus,  $\ell(1, 0) = 1$  and  $s(1, 0) = 1$ .  $\square$

LEMMA 1. For all  $g \in \{0, 1, 2\}$ ,  $s(1, g) = 1$ .

*Proof of Lemma 1* Note that we have already shown  $s(1, 0) = 1$  by Example 2. Therefore, suppose  $g = 1$  or  $g = 2$ .

First, consider when the split line  $z_2 = \mu$  intersects the NLS. Then solving one lexicographic IP (5) finds  $z^*$  such that  $z_2^* = \mu$  (we do not count lexicographic IPs for  $s$ ). Once the line segment containing  $z^*$  is generated, the single-objective IP (8) is solved to determine if the line segment is nondominated. As mentioned previously, the algorithm checks if  $z_2^1 = z_2^L$  and  $z_1^L < z_1^1$ , in which case endpoint  $z^1$  is flagged as open, and it is known that  $z^L$  dominates  $z^1$  (and similarly for  $z^2$  and  $z^R$ ). Note that by assumption,  $n = 1$  implies there are no other NDPs in the interior of  $B(z^1, z^2)$  that dominate the line segment, and by construction we have the conditionally strict inequality that prevents finding  $z^L$  (or  $z^R$ ) in the case that  $z^L$  dominates  $z^1$  (or  $z^R$  dominates  $z^2$ ). Hence, an optimal solution to the single-objective IP (8) will certainly map to a point on the line segment, which will terminate the while loop within the inner loop. Since the NDPs that dominate the open endpoints are known, no additional single-objective IPs will be solved to discover what points dominate  $z^1$  or  $z^2$ , and so the inner loop terminates.

Once the inner loop has generated the NLS within the given region, the outer loop will add at most two nontrivial boxes, whose interiors contain  $n' = n'' = 0$  NLSs, to the queue. So we have for some nonnegative integers  $(g', g'') \in \mathbb{Z}_+^2$  where  $g' + g'' = g$  but  $g', g'' \leq 1$

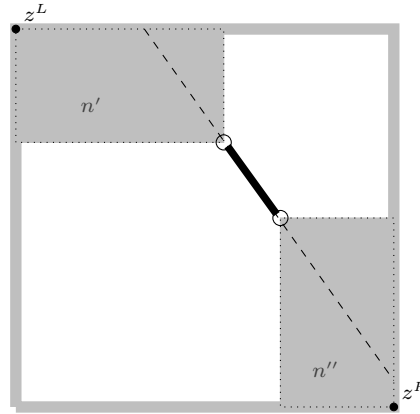

**Figure 3** General NDF where there are  $n \geq 1$  nondominated line segments. In the worst case for counting single-objective IP solves, both endpoints are open.

(this follows from  $g' \leq n' + 1$  and  $g'' \leq n'' + 1$  where  $n' = n'' = 0$ ). Therefore,  $s(1, g) = 1 + s(0, g') + s(0, g'') = 1$  because  $s(0, 0) = 0$  by definition, and  $s(0, 1) = 0$  by Example 1. Thus,  $s(1, g) = 1$  for  $g \in \{0, 1, 2\}$ .

Second, consider when the split line crosses at a vertical gap in the NDF. Note that a single-objective IP is not solved until the inner loop is initiated, which respectively does not occur until a NDP is found on the split line. Therefore there can be at most  $g$  iterations of the outer loop in which  $z_2^* < \mu$ , wherein each iteration is only performing lexicographic IP solves as the split line identifies a vertical gap in the NDF which is then removed by initiating new boxes to the queue (note we do not count any of these lexicographic IP solves). Therefore, in at most  $g$  iterations the lexicographic optimization IP will return  $z^*$  such that  $z_2^* = \mu$ . At such point, the process would follow the process argued above, so again we have  $s(1, g) = 1$  for  $g \in \{0, 1, 2\}$ .  $\square$

**THEOREM 1.** For all  $n \geq 1$ ,  $\hat{s}(n) = \frac{n(n+1)}{2} + 2(n-1)$ .

*Proof of Theorem 1* We use induction. The case  $n = 1$  follows since  $\hat{s}(1) = 1 = \frac{1(1+1)}{2} + 2(1-1)$ . Now assume that, for some  $n \geq 1$ ,  $\hat{s}(n) = \frac{n(n+1)}{2} + 2(n-1)$ , and consider  $\hat{s}(n+1)$ . By Lemma 2 and the inductive assumption,

$$\begin{aligned} \hat{s}(n+1) &= n + 3 + \hat{s}(n) = n + 3 + \frac{n(n+1)}{2} + 2(n-1) = \frac{1}{2}n^2 + \frac{7}{2}n + 1 \\ &= \frac{1}{2}n^2 + \frac{3}{2}n + 1 + 2n = \frac{(n+1)(n+2)}{2} + 2n, \end{aligned}$$

as required.  $\square$

#### 4. Line Segment Trimming Subroutine

Let  $L_\alpha := L(\alpha^1, \alpha^2)$ , where  $\alpha_1^1 < \alpha_1^2$  and  $\alpha_2^1 > \alpha_2^2$ , denote the current (or “child”) line segment, which contains NDP  $z^\alpha$ , and has gradient vector  $\vec{w}^\alpha$ . Suppose that a line segment from a parent call,  $L_\beta := L(\beta^1, \beta^2)$ , where  $\beta_1^1 < \beta_1^2$  and  $\beta_2^1 > \beta_2^2$ , contains the NDP  $z^\beta$  and has gradient  $\vec{w}^\beta$ . The two line segments  $L_\alpha$  and  $L_\beta$  can be extended to lines that intersect provided  $\vec{w}^\alpha \neq \vec{w}^\beta$  (recall the gradient vectors are normalized). Their point of intersection,  $\gamma \in \mathbb{R}^2$ , is easily computed: it is the solution of the system of two linear equations given by  $\vec{w}^\alpha \gamma = \vec{w}^\alpha z^\alpha$  and  $\vec{w}^\beta \gamma = \vec{w}^\beta z^\beta$ .

The resulting intersection point is contained in both line segments if and only if

$$\gamma_1 \in [\alpha_1^1, \alpha_1^2] \cap [\beta_1^1, \beta_1^2] \quad \text{and} \quad \gamma_2 \in [\alpha_2^2, \alpha_2^1] \cap [\beta_2^2, \beta_2^1]. \quad (3)$$

If  $\gamma$  satisfies (3), then the current line segment,  $L_\alpha$ , is trimmed. Exactly one of the two subsets of  $L_\alpha$ ,  $L(\alpha^1, \gamma)$  or  $L(\gamma, \alpha^2)$ , must be dominated by points from  $L_\beta$ . Since  $z^\alpha \in L_\alpha$  is an NDP,  $L_\alpha$  is trimmed so as to retain the portion of it that contains  $z^\alpha$ : if  $\gamma_1 < z_1^\alpha$ , then update  $\alpha^1 = \gamma$  and flag  $\alpha^1$  to be closed; otherwise, if  $\gamma_1 > z_1^\alpha$ , then update  $\alpha^2 = \gamma$  and flag  $\alpha^2$  to be closed. In the unlikely case that  $\gamma_1 = z_1^\alpha$ ,  $L_\alpha$  is trimmed as follows: if  $\gamma_1 < z_1^\beta$ , then update  $\alpha^2 = \gamma$  and flag  $\alpha^2$  to be closed; otherwise, if  $\gamma_1 > z_1^\beta$ , then update  $\alpha^1 = \gamma$  and flag  $\alpha^1$  to be closed. Note that updating the appropriate endpoint of  $L_\alpha$  to be the intersection point  $\gamma$  and flagging it as closed prevents rediscovery of any point in  $L_\beta$  that dominates any part of  $L_\alpha$ . See Algorithm 6 for details.

---

**Algorithm 6** LineTrim: Segment Trimming

---

**Input:**  $z^*$  nondominated point

**Input:**  $z^1, z^2, \vec{w}$  upper-left and lower-right points of the line segment and the gradient vector

**Input:**  $L = \{L_1, L_2, \dots, L_n\}$  finite (possibly empty) set of line segments to test for intersection, where  $L_i = L(a^i, b^i)$

**Output:**  $(z^1, z^2, \vec{w}, w\_known)$  the endpoints for the line segment of frontier including  $z^*$  and the gradient vector (if found)

1: **if**  $L = \emptyset$  **then**

2:     **return**  $(z^1, z^2)$

3: **end if**

4: **for**  $i=1, 2, \dots, n$  **do**

5:      $\vec{w}^i \leftarrow (b_1^i - a_1^i, a_2^i - b_2^i)$

6:      $\vec{w}^i \leftarrow \vec{w} / \|\vec{w}\|_1$

7:     **if**  $\vec{w} \neq \vec{w}^i$  **then**

8:         solve SLE for  $\gamma$ :

$$\begin{bmatrix} \vec{w}_1 & \vec{w}_2 \\ \vec{w}_1^i & \vec{w}_2^i \end{bmatrix} \begin{bmatrix} \gamma_1 \\ \gamma_2 \end{bmatrix} = \begin{bmatrix} \vec{w}_1 z_1^* + \vec{w}_2 z_2^* \\ \vec{w}_1^i a_1^i + \vec{w}_2^i a_2^i \end{bmatrix}$$

9:         **if**  $\gamma_1 \in [z_1^1, z_1^2] \cap [a_1^i, b_1^i]$  **and**  $\gamma_2 \in [z_2^2, z_2^1] \cap [b_2^i, a_2^i]$  **then**

10:             **if**  $\gamma_1 < z_1^*$  **then**

11:                  $z^1 \leftarrow \gamma$

12:             **else**  $\{\gamma_1 > z_1^*\}$

13:                  $z^2 \leftarrow \gamma$

14:             **end if**

15:         **end if**

16:     **end if**

17: **end for**

18: **return**  $(z^1, z^2)$

---

## 5. Instance Generation

The generated instances have the objective functions  $z_1(x) := x_1$  and  $z_2(x) := x_2$ , where  $x \in \mathbb{R}^2$  is a vector of two continuous decision variables. Each instance's NDF includes some sections of the line segment  $L_k = \{(x_1, x_2) \in \mathbb{R}^2 : x_1 + x_2 = 0, -k \leq x_i \leq k \text{ for } i = 1, 2\}$  where  $k \in (0, \infty)$  is a parameter. This line segment will be one slice in the instance. The instance has  $\pi$  other slices, where  $\pi$  is a parameter, all of which have their image in criterion space given by a pointed cone. The vertices of each cone lie on a line segment parallel to  $L_k$  but shifted vertically down by  $d \in (0, \frac{2k}{\pi})$  units: they lie on

$$L_d = \{(x_1, x_2) : x_1 + x_2 = -d, -k \leq x_i \leq k - d \text{ for } i = 1, 2\},$$

where  $d$  is a parameter. The slice with vertex  $(a, b) \in L_d$  is generated by the slice problem with feasible set

$$P_{(a,b)}(\theta_1, \theta_2) = \{x \in \mathbb{R}^2 : \theta_1 x_1 + (1 - \theta_1)x_2 \geq \theta_1 a + (1 - \theta_1)b \quad (4)$$

$$\theta_2 x_1 + (1 - \theta_2)x_2 \geq \theta_2 a + (1 - \theta_2)b\}, \quad (5)$$

where  $\theta_1 \in [\frac{1}{2}, 1]$  and  $\theta_2 \in [0, \frac{1}{2}]$  are parameters that control the width of the cone. These ranges for  $\theta_1$  and  $\theta_2$  ensure that the resulting cone contains  $(a, b) + \mathbb{R}_+^2$  and is contained in the half-space that contains  $L_d + \mathbb{R}_+^2$ . Figure 4 illustrates this structure, showing the image of the feasible set in criterion space for 4 slices:  $L_k$  and three pointed cones with vertices lying on  $L_d$ . Note that  $\theta_1 = 1$  and  $\theta_2 = 0$  imply that the cone is precisely  $(a, b) + \mathbb{R}_+^2$ , and hence that  $(a, b)$  is an isolated NDP. Otherwise, if  $\theta_1 < 1$ , the left-hand boundary of the cone, from  $(a, b)$  to its intersection with  $L$ , is an NLS, while if  $\theta_2 > 0$ , the right-hand boundary of the cone, from  $(a, b)$  to its intersection with  $L_k$ , is an NLS. All instances are constructed to have the property that no two cones overlap within the band between  $L_k$  and  $L_d$ . This means that  $L_k$  alternates between a section that is part of the NDF and a section dominated by one cone.

Given any set of  $\pi$  polyhedra, say  $P^i = \{x \in \mathbb{R}^m : A^i x \geq c^i\}$ , for  $i = 1, \dots, \pi$ , the MIP feasible set  $\{(x, y) \in \mathbb{R}^m \times \{0, 1\}^\pi : A^i x \geq c^i - M_i(1 - y_i), \forall i = 1, \dots, \pi, \sum_{i=1}^\pi y_i = 1\}$  has (for appropriately chosen big-M values,  $(M_i)_{i=1}^\pi$ ) slice problems with feasible sets  $\{P^i\}_{i=1}^\pi$ . We take the objective function vector to be  $z(x) = (x_1, \dots, x_m)$  so that any polyhedron in criterion space is easily reverse-engineered to give a polyhedron in decision space (they have precisely the same description).

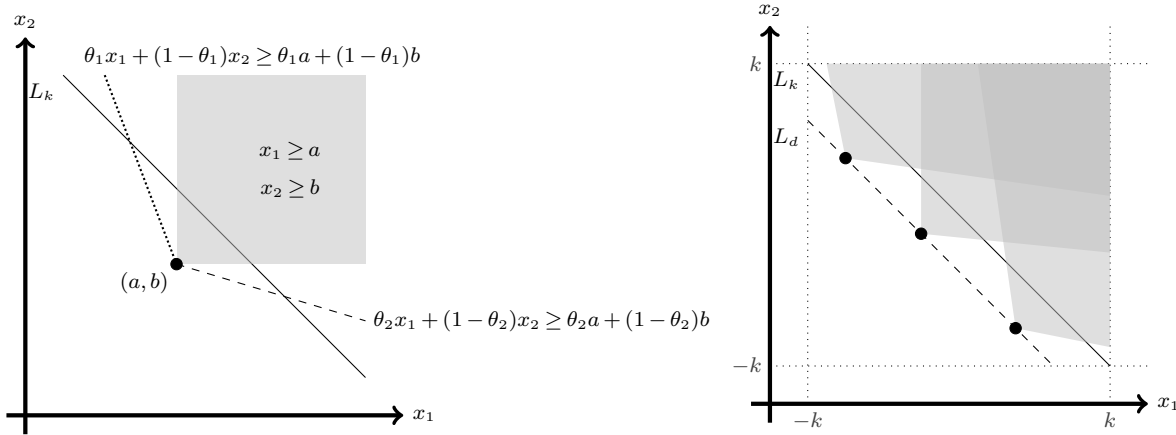

**Figure 4** (Left) The orthogonal pointed cone with vertex  $(a, b)$  is shaded. The generalized pointed cone is defined between the dotted and dashed lines. Different slices in an instance may have different values of  $\theta_1$  and  $\theta_2$ . (Right) An example with 4 slices, including  $L_k$  and the boundary of three cones.

For the  $\pi + 1$  polyhedra consisting of  $L_k$  and  $\pi$  pointed cones  $P_{(a_i, b_i)}(\theta_1^i, \theta_2^i)$ , for  $i = 1, \dots, \pi$ , where  $(a_i, b_i)$  denotes the vertex of the  $i$ th cone, this gives the following BOMIP:

$$\text{minimize} \quad (x_1, x_2) \quad (6)$$

$$\text{s.t.} \quad x_1 + x_2 \geq -2k(1 - y_0) \quad (7)$$

$$\theta_1^i x_1 + (1 - \theta_1^i)x_2 \geq \theta_1^i a_i + (1 - \theta_1^i)b_i - 2k(1 - y_i) \quad \forall i = 1, 2, \dots, \pi \quad (8)$$

$$\theta_2^i x_1 + (1 - \theta_2^i)x_2 \geq \theta_2^i a_i + (1 - \theta_2^i)b_i - 2k(1 - y_i) \quad \forall i = 1, 2, \dots, \pi \quad (9)$$

$$\sum_{i=0}^{\pi} y_i = 1 \quad (10)$$

$$-k \leq x_i \leq k \quad \forall i = 1, 2 \quad (11)$$

$$y \in \{0, 1\}^{\pi+1}. \quad (12)$$

This BOMIP has a number of variables and a number of constraints that is linear in  $\pi$ : it has  $\pi + 3$  variables and  $4 + 2\pi$  constraints.

We generate two different classes of instances having the structure described above. One class has the  $\pi$  cone points distributed randomly along  $L_d$ , but has  $\theta_1 = 1$  and  $\theta_2 = 0$  for all cones. Since this means that all cones are orthogonal pointed cones, we refer to these as *fixed cone-width instances*. An illustration of these instances is given in Figure 5. The other class has the cone points equally spaced along  $L_d$ , but has randomized values of  $\theta_1$  and  $\theta_2$ ; we call these *randomized cone-width instances*. These are illustrated by the right-hand side of Figure 4.

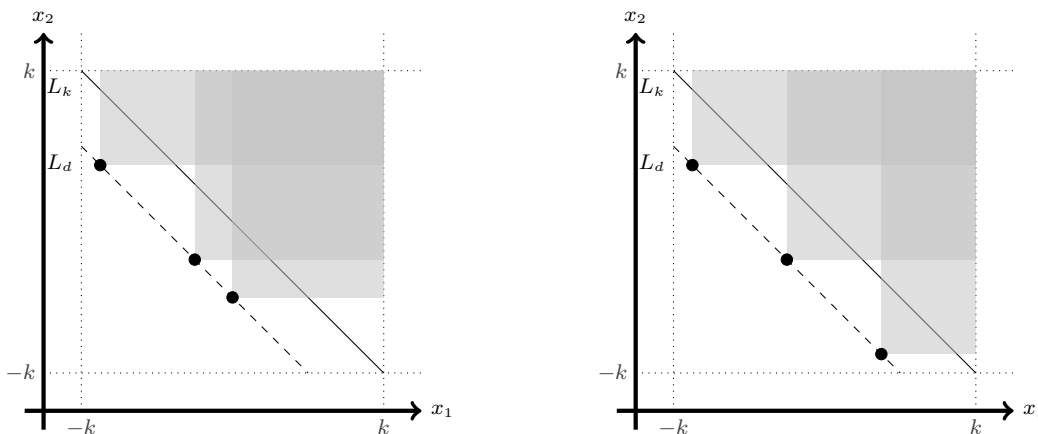

**Figure 5** NDPs and associated cones generated by the fixed cone-width class of instances. (Left) If the pointed cones from NDPs overlap on  $L_k$ , then there are fewer than  $\pi + 1$  nondominated segments of  $L_k$ . (Right) Choosing the NDPs such that  $-b_i < a_{i+1}$  prevents such overlapping, thus guaranteeing exactly  $\pi + 1$  line segments of  $L_k$  are nondominated. All instances we generate are of the latter form.

All instances are carefully designed to ensure that each NLS, which is not a point, has length at least  $\epsilon$ . In the case of the fixed cone-width instances, the only such NLSs are sections of  $L_k$ , and these can be guaranteed to have length at least  $\epsilon$  by a careful choice of the randomized spacing between cone points, as a function of  $d$ . For fixed cone-width instances we take  $d = k/4$ , and we expect the choice of  $k$  to ensure that  $d \geq \epsilon$ . The latter condition also ensures that the horizontal and vertical gaps in the NDF are of length at least  $\epsilon$ . In the case of random cone-width instances, an NLS may be either a section of  $L_k$  or a section of a cone boundary. The length of an NLS from  $L_k$  is ensured to be at least  $\epsilon$  by restricting the values of  $\theta_1$  and  $\theta_2$  to lie within  $[\frac{3}{4}, 1]$  and  $[0, \frac{1}{2}]$ , respectively, and choosing  $d = k/(\pi + 1) - \frac{1}{2}$ . The length of an NLS generated by a cone boundary is ensured to be at least  $\epsilon$  by requiring  $d \geq \epsilon$ . Again, we expect the choice of  $k$  to guarantee that  $d \geq \epsilon$ , ensuring that the horizontal and vertical gaps in the NDF are also of length at least  $\epsilon$ . We force a proportion of the cones in a randomized cone-width instance to be orthogonal<sup>1</sup>.

Specifics of our procedure for generating fixed cone-width instances are given in Algorithm 7. By construction, the NDF associated with such an instance has exactly  $\pi$  isolated NDPs and  $\pi + 1$  line segments (2 half-open at the ends of  $L_k$  and  $\pi - 1$  open segments in between isolated NDPs). Even large instances of this class of BOMIPs are solved quite

<sup>1</sup> A cone is chosen to be orthogonal with probability  $\phi$ , a parameter. In all our instances, we used  $\phi = 0.05$ .

quickly by most methods, so they are not ideal for testing computational efficiency. However, since their NDFs are known exactly, these instances are useful for validating the correctness of an algorithm.

Specifics of our procedure for generating random cone-width instances are given in Algorithm 8 and Algorithm 9, which generate the cone width parameters  $\{(\theta_1^i, \theta_2^i)\}_{i=1}^\pi$  and cone vertices,  $\{(a^i, b^i)\}_{i=1}^\pi$ , respectively. The NDFs associated with the resulting BOMIP will have no more than  $3\pi + 1$  line segments ( $\pi + 1$  from  $L_k$  and at most 2 per cone), including open endpoints induced by any orthogonal cones and closed endpoints induced by intersecting slices. The random cone-width class of instances is more difficult to solve, in practice, than the fixed cone-width, because of the high frequency of intersecting slices in the NDF.

Together, these two structured sets of instances provide a useful way to study the accuracy and robustness of a BOMIP algorithm.

---

**Algorithm 7** Fixed Cone-Width NDP Generation

---

```

1:  $d = k/4$  (distance by which  $L_d$  is shifted down)
2:  $w = (2k - d)/n$  (the width of subintervals)
3:  $a_1 = U(-k, -k + w)$ 
4:  $b_1 = -a_1 - d$ 
5: for  $i = 2, 3, \dots, n$  do
6:    $a_i = U(\max\{-k + (i - 1)w, -b_{i-1} + \epsilon\}, -k + iw)$ 
7:    $b_i = -a_i - d$ 
8: end for

```

---



---

**Algorithm 8** Randomized Theta Generation

---

```

1: thetalist =  $\emptyset$ 
2: for  $i = 1, 2, \dots, n$  do
3:   if  $U(0, 1) \leq \pi$  then
4:      $\theta_1 = 1$ 
5:      $\theta_2 = 0$ 
6:   else
7:      $\theta_1 = U(\frac{3}{4}, 1)$ 
8:      $\theta_2 = U(0, \frac{1}{4})$ 
9:   end if
10:  thetalist.append( $(\theta_1, \theta_2)$ )
11: end for

```

---



---

**Algorithm 9** Randomized Cone-Width NDP Generation

---

```

1:  $d = k/(n + 1) - 0.5$ 
2:  $a_1 = -k + 0.5d$ 
3:  $b_1 = -a_1 - d$ 
4: for  $i = 2, \dots, n$  do
5:    $a_i = a_{i-1} + 2d + 1$ 
6:    $b_i = -a_i - d$ 
7: end for

```

---

## 6. Comparison between BLM variants

| Algorithm | Ins | nNDP   | nIPF  | TT     | IPT    | LPT   | nIP    | nLex   | nMin | nScal  | nGood | nLP     | nBox   | nSIS   | nZL    |
|-----------|-----|--------|-------|--------|--------|-------|--------|--------|------|--------|-------|---------|--------|--------|--------|
| Basic     | 16  | 2810   | 115   | 680.0  | 522.1  | 157.0 | 8591   | 2848   | 14   | 2881   | -     | 22687   | 2839   | 2302   | 2830   |
|           | 17  | 2986   | 110   | 865.4  | 668.1  | 196.4 | 9058   | 3003   | 7    | 3045   | -     | 24920   | 2995   | 2442   | 2987   |
|           | 18  | 2775   | 101   | 739.1  | 571.8  | 166.7 | 8399   | 2787   | 12   | 2813   | -     | 22478   | 2778   | 2253   | 2769   |
|           | 19  | 6204   | 181   | 2060.2 | 1650.6 | 407.2 | 18721  | 6217   | 18   | 6269   | -     | 53756   | 6205   | 5145   | 6193   |
|           | 20  | 3145   | 100   | 849.7  | 646.1  | 202.6 | 9596   | 3182   | 34   | 3198   | -     | 26839   | 3168   | 2704   | 3154   |
| Avg.      |     | 3584   | 121.4 | 1038.9 | 811.7  | 226.0 | 10873  | 3607.4 | 17   | 3641.2 | -     | 30136   | 3597   | 2969.2 | 3586.6 |
| SIS       | 16  | 2764   | 115   | 206.0  | 148.6  | 57.1  | 1934   | 517    | 14   | 551    | 335   | 8287    | 843    | 335    | 500    |
|           | 17  | 2952   | 110   | 257.7  | 185.6  | 71.7  | 1960   | 521    | 7    | 562    | 349   | 8915    | 862    | 349    | 507    |
|           | 18  | 2738   | 101   | 232.8  | 170.5  | 61.9  | 1909   | 506    | 12   | 535    | 350   | 8172    | 847    | 350    | 492    |
|           | 19  | 6166   | 181   | 577.1  | 433.1  | 143.1 | 3805   | 1018   | 16   | 1080   | 673   | 18212   | 1681   | 673    | 1000   |
|           | 20  | 3122   | 100   | 216.1  | 148.8  | 66.9  | 1748   | 454    | 33   | 471    | 336   | 8698    | 777    | 336    | 427    |
| Avg.      |     | 3548.4 | 121.4 | 297.9  | 217.3  | 80.1  | 2271.2 | 603.2  | 16.4 | 639.8  | 408.6 | 10456.8 | 1002   | 408.6  | 585.2  |
| Recursive | 16  | 2810   | 115   | 639.7  | 485.7  | 153.2 | 8212   | 2586   | -    | 3040   | -     | 22340   | 2577   | 2220   | 2568   |
|           | 17  | 2987   | 110   | 835.3  | 639.2  | 195.3 | 8757   | 2799   | -    | 3159   | -     | 24674   | 2791   | 2416   | 2783   |
|           | 18  | 2775   | 101   | 691.6  | 527.2  | 163.6 | 8015   | 2512   | -    | 2991   | -     | 22161   | 2503   | 2138   | 2494   |
|           | 19  | 6198   | 181   | 2006.9 | 1594.1 | 410.4 | 18023  | 5718   | -    | 6587   | -     | 53148   | 5706   | 4964   | 5694   |
|           | 20  | 3144   | 100   | 824.9  | 618.7  | 205.2 | 9113   | 2828   | -    | 3457   | -     | 26537   | 2814   | 2458   | 2800   |
| Avg.      |     | 3582.8 | 121.4 | 999.7  | 773    | 225.5 | 10424  | 3288.6 | -    | 3846.8 | -     | 29772   | 3278.2 | 2839.2 | 3267.8 |

**Table 1** Comparison between the different algorithms for historical instances, class C160. Times are reported in seconds.

| Algorithm | Ins | nNDP    | nIPF  | TT      | IPT     | LPT    | nIP     | nLex  | nMin | nScal   | nGood  | nLP      | nBox    | nSIS    | nZL     |
|-----------|-----|---------|-------|---------|---------|--------|---------|-------|------|---------|--------|----------|---------|---------|---------|
| Basic     | 21  | 16850   | 294   | 37665.5 | 33307.6 | 4339.7 | 53514   | 17790 | 40   | 17894   | -      | 171370   | 17803   | 15926   | 17766   |
|           | 22  | 19778   | 410   | 42045.3 | 36927.4 | 5095.7 | 61766   | 20540 | 23   | 20663   | -      | 191611   | 20510   | 18074   | 20476   |
|           | 23  | 17319   | 343   | 38995.1 | 34570.3 | 4409.4 | 53859   | 17895 | 26   | 18043   | -      | 171514   | 17884   | 15776   | 17871   |
|           | 24  | 19898   | 460   | 46967.1 | 41632.8 | 5312.7 | 62338   | 20706 | 34   | 20892   | -      | 200619   | 20696   | 17867   | 20682   |
|           | 25  | 13682   | 337   | 24450.1 | 21268.9 | 3171.0 | 42196   | 14024 | 27   | 14121   | -      | 130934   | 13994   | 12130   | 13964   |
| Avg.      |     | 17505.4 | 368.8 | 38024.6 | 33541.4 | 4465.7 | 54734.6 | 18191 | 30   | 18322.6 | -      | 173209.6 | 18177.4 | 15954.6 | 18151.8 |
| SIS       | 21  | 15699   | 294   | 6106.2  | 4890.5  | 1211.5 | 6598    | 1741  | 40   | 1849    | 1227   | 43443    | 2956    | 1227    | 1722    |
|           | 22  | 18840   | 410   | 7788.7  | 6297.5  | 1485.3 | 8613    | 2287  | 23   | 2421    | 1595   | 52662    | 3850    | 1595    | 2233    |
|           | 23  | 16449   | 343   | 6977.4  | 5607.1  | 1366.8 | 7459    | 1982  | 26   | 2131    | 1338   | 46627    | 3309    | 1338    | 1961    |
|           | 24  | 18546   | 460   | 9535.6  | 7899.2  | 1630.3 | 10070   | 2672  | 34   | 2884    | 1808   | 56219    | 4468    | 1808    | 2679    |
|           | 25  | 13239   | 337   | 5329.1  | 4296.6  | 1029.2 | 6578    | 1753  | 26   | 1853    | 1193   | 37911    | 2916    | 1193    | 1700    |
| Avg.      |     | 16554.6 | 368.8 | 7147.4  | 5798.2  | 1344.6 | 7863.6  | 2087  | 29.8 | 2227.6  | 1432.2 | 47372.4  | 3499.8  | 1432.2  | 2059    |
| Recursive | 21  | 16831   | 294   | 37201.4 | 32767.3 | 4417.0 | 52297   | 16979 | -    | 18339   | -      | 170040   | 16971   | 15611   | 16955   |
|           | 22  | 19763   | 410   | 41650   | 36417.7 | 5210.1 | 60312   | 19600 | -    | 21112   | -      | 189879   | 19568   | 17830   | 19536   |
|           | 23  | 17315   | 343   | 38684.6 | 34149.4 | 4521.7 | 52585   | 17042 | -    | 18501   | -      | 170082   | 17030   | 15546   | 17018   |
|           | 24  | 19890   | 460   | 46196.8 | 40725.8 | 5449.5 | 60571   | 19576 | -    | 21419   | -      | 198351   | 19566   | 17509   | 19552   |
|           | 25  | 13667   | 337   | 24635   | 21314.5 | 3310.4 | 40899   | 13143 | -    | 14613   | -      | 129295   | 13113   | 11834   | 13083   |
| Avg.      |     | 17493.2 | 368.8 | 37673.6 | 33074.9 | 4581.7 | 53332.8 | 17268 | -    | 18796.8 | -      | 171529.4 | 17249.6 | 15666   | 17228.8 |

**Table 2** Comparison between the different algorithms for historical instances, class C320. Times are reported in seconds.

| Algorithm | Ins | nNDP    | nIPF | TT     | IPT    | LPT    | nIP     | nLex    | nMin  | nScal   | nGood | nLP      | nBox    | nSIS | nZL     |
|-----------|-----|---------|------|--------|--------|--------|---------|---------|-------|---------|-------|----------|---------|------|---------|
| Basic     | A   | 15002   | 5001 | 3996.1 | 1803.6 | 1875.2 | 52010   | 14653   | 398   | 22306   | -     | 104487   | 14613   | 3259 | 14567   |
|           | B   | 15002   | 5001 | 3853.1 | 1687.7 | 1849.7 | 51738   | 14561   | 493   | 22123   | -     | 103984   | 14519   | 3154 | 14475   |
|           | C   | 15002   | 5001 | 3981.6 | 1850.5 | 1819.9 | 51695   | 14544   | 518   | 22089   | -     | 103755   | 14495   | 3193 | 14446   |
|           | D   | 15002   | 5001 | 3842.0 | 1699.0 | 1824.9 | 51744   | 14601   | 449   | 22093   | -     | 104201   | 14563   | 3153 | 14521   |
|           | E   | 15002   | 5001 | 3948.9 | 1767.4 | 1864.2 | 51745   | 14574   | 474   | 22123   | -     | 104228   | 14542   | 3116 | 14504   |
| Avg.      |     | 15002   | 5001 | 3924.3 | 1761.6 | 1846.8 | 51786.4 | 14586.6 | 466.4 | 22146.8 | -     | 104131   | 14546.4 | 3175 | 14502.6 |
| SIS       | A   | 15002   | 5001 | 4454.9 | 2278.3 | 1852.4 | 53523   | 16157   | 326   | 20820   | 63    | 113195   | 16218   | 63   | 16064   |
|           | B   | 15002   | 5001 | 4909.8 | 2623.9 | 1976.3 | 53881   | 16322   | 386   | 20749   | 102   | 113185   | 16397   | 102  | 16191   |
|           | C   | 15002   | 5001 | 4267.5 | 1969.3 | 1973.5 | 53239   | 16081   | 422   | 20592   | 63    | 112113   | 16126   | 63   | 15954   |
|           | D   | 15002   | 5001 | 4334.7 | 2025.1 | 1985.4 | 53682   | 16209   | 373   | 20798   | 93    | 113018   | 16277   | 93   | 16092   |
|           | E   | 15002   | 5001 | 4642.9 | 2328.5 | 1982.3 | 53552   | 16187   | 391   | 20704   | 83    | 112541   | 16239   | 83   | 16065   |
| Avg.      |     | 15002   | 5001 | 4522.0 | 2245.0 | 1954.0 | 53575.4 | 16191.2 | 379.6 | 20732.6 | 80.8  | 112810.4 | 16251.4 | 80.8 | 16073.2 |
| Recursive | A   | 15002   | 5001 | 2861.8 | 1383.9 | 1184.6 | 29711   | 3638    | -     | 22435   | -     | 72937    | 3616    | 1    | 3594    |
|           | B   | 15002   | 5001 | 2788.4 | 1301.3 | 1192.8 | 29587   | 3614    | -     | 22359   | -     | 72826    | 3594    | 1    | 3574    |
|           | C   | 15004   | 5001 | 2827.3 | 1350.4 | 1184.6 | 29538   | 3597    | -     | 22344   | -     | 72824    | 3578    | 1    | 3559    |
|           | D   | 15002   | 5001 | 2788.5 | 1306.2 | 1187.8 | 29664   | 3630    | -     | 22404   | -     | 72986    | 3608    | 1    | 3586    |
|           | E   | 15002   | 5001 | 2851.8 | 1367.3 | 1189.4 | 29641   | 3689    | -     | 22263   | -     | 72909    | 3664    | 1    | 3639    |
| Avg.      |     | 15002.4 | 5001 | 2823.6 | 1341.8 | 1187.8 | 29628.2 | 3633.6  | -     | 22361   | -     | 72896.4  | 3612    | 1    | 3590.4  |

**Table 3** Comparison between the different algorithms for generated instances,  $n = 5000$ . Times are reported in seconds.

| Algorithm | Ins | nNDP    | nIPF | TT      | IPT    | LPT    | nIP     | nLex    | nMin  | nScal   | nGood | nLP      | nBox    | nSIS | nZL     |
|-----------|-----|---------|------|---------|--------|--------|---------|---------|-------|---------|-------|----------|---------|------|---------|
| Basic     | A   | 22502   | 7501 | 9268.1  | 4379.1 | 4008.0 | 81466   | 21893   | 669   | 37011   | -     | 157416   | 21833   | 8149 | 21765   |
|           | B   | 22502   | 7501 | 9093.0  | 4228.6 | 3981.7 | 81333   | 21847   | 705   | 36934   | -     | 157264   | 21796   | 8101 | 21741   |
|           | C   | 22502   | 7501 | 8912.3  | 4065.1 | 3984.0 | 81446   | 21847   | 704   | 37048   | -     | 157339   | 21797   | 8192 | 21747   |
|           | D   | 22502   | 7501 | 8460.9  | 3818.5 | 3814.2 | 81301   | 21807   | 746   | 36941   | -     | 157198   | 21757   | 8058 | 21705   |
|           | E   | 22502   | 7501 | 8672.5  | 4058.3 | 3786.0 | 81444   | 21840   | 708   | 37056   | -     | 157230   | 21794   | 8240 | 21742   |
| Avg.      |     | 22502   | 7501 | 8881.4  | 4109.9 | 3914.8 | 81398   | 21846.8 | 706.4 | 36998   | -     | 157289.4 | 21795.4 | 8148 | 21740   |
| SIS       | A   | 22502   | 7501 | 11346.9 | 6662.2 | 3791.6 | 79742   | 24039   | 595   | 30955   | 114   | 168338   | 24123   | 114  | 23916   |
|           | B   | 22502   | 7501 | 12163.8 | 7132.0 | 4131.0 | 79662   | 23994   | 591   | 30960   | 123   | 167968   | 24073   | 123  | 23854   |
|           | C   | 22501   | 7501 | 12520.1 | 7754.7 | 3879.3 | 79925   | 24106   | 595   | 31013   | 105   | 168628   | 24178   | 105  | 23968   |
|           | D   | 22502   | 7501 | 12395.5 | 7320.7 | 4155.7 | 79593   | 23959   | 628   | 30944   | 103   | 168028   | 24034   | 103  | 23817   |
|           | E   | 22503   | 7501 | 11874.0 | 6862.9 | 4129.8 | 79772   | 24007   | 621   | 31027   | 110   | 168178   | 24086   | 110  | 23889   |
| Avg.      |     | 22502   | 7501 | 12060.1 | 7146.5 | 4017.5 | 79738.8 | 24021   | 606   | 30979.8 | 111   | 168228   | 24098.8 | 111  | 23888.8 |
| Recursive | A   | 22502   | 7501 | 6544.4  | 3209.7 | 2535.2 | 44466   | 5305    | -     | 33856   | -     | 109695   | 5278    | 1    | 5251    |
|           | B   | 22502   | 7501 | 6329.9  | 3016.2 | 2517.2 | 44485   | 5382    | -     | 33721   | -     | 109677   | 5345    | 1    | 5308    |
|           | C   | 22502   | 7501 | 6341.6  | 2964.6 | 2562.0 | 44445   | 5257    | -     | 33931   | -     | 109532   | 5228    | 1    | 5199    |
|           | D   | 22502   | 7501 | 6172.0  | 2822.3 | 2538.8 | 44415   | 5136    | -     | 34143   | -     | 109698   | 5099    | 1    | 5062    |
|           | E   | 22505   | 7501 | 6345.6  | 2997.1 | 2538.9 | 44451   | 5284    | -     | 33883   | -     | 109541   | 5252    | 2    | 5220    |
| Avg.      |     | 22502.6 | 7501 | 6346.7  | 3002.0 | 2538.4 | 44452.4 | 5272.8  | -     | 33906.8 | -     | 109628.6 | 5240.4  | 1.2  | 5208    |

**Table 4** Comparison between the different algorithms for generated instances,  $n = 7500$ . Times are reported in seconds.

## References

- Y. P. Aneja and K. P. Nair. Bicriteria transportation problem. *Management Science*, 25(1):73–78, 1979.
- J. L. Cohon. *Multiobjective programming and planning*. Academic Press, 1978.
